# Supplementary material
Source: Research Square preprint supplement (doi:10.21203/rs.3.rs-8982107/v1)
Supplement: Supplementary file 1 [file e388fab77d0a6d5a5bb9f6d6.xlsx]

## Sheet: bats
Taxon	# Real sequences (n_real)	# Synthetic sequences (n_synth)	# Synthetic in real clade (synth_in_real_clade)	In-clade rate (synth/real clade) (= in_clade_rate)	Real clade monophyly (= real_monophyly)	Non-focal real-tip count (= other_real_in_mrca)
Ametrida_centurio	9	30	26	0.8667	FALSE	396
Anoura_caudifer	7	30	29	0.9667	TRUE	0
Anoura_geoffroyi	11	30	29	0.9667	TRUE	0
Artibeus_amplus	5	30	27	0.9	FALSE	45
Artibeus_cinereus	9	30	18	0.6	TRUE	0
Artibeus_concolor	7	30	26	0.8667	TRUE	0
Artibeus_glaucus	21	60	60	1	TRUE	0
Artibeus_lituratus	16	30	28	0.9333	TRUE	0
Artibeus_obscurus	12	30	29	0.9667	TRUE	0
Artibeus_planirostris	17	30	26	0.8667	TRUE	0
Carollia_brevicauda	23	60	59	0.9833	FALSE	39
Carollia_perspicillata	39	30	29	0.9667	TRUE	0
Chiroderma_villosum	5	30	26	0.8667	TRUE	0
Choeroniscus_minor	4	30	15	0.5	TRUE	0
Chrotopterus_auritus	5	30	20	0.6667	TRUE	0
Cormura_brevirostris	3	30	28	0.9333	TRUE	0
Cynomops_paranus	5	30	23	0.7667	TRUE	0
Desmodus_rotundus	3	30	1	0.0333	TRUE	0
Diaemus_youngi	3	30	13	0.4333	TRUE	0
Eumops_auripendulus	3	30	16	0.5333	TRUE	0
Eumops_hansae	3	30	24	0.8	TRUE	0
Glossophaga_soricina	3	30	24	0.8	TRUE	0
Glyphonycteris_sylvestris	3	30	28	0.9333	TRUE	0
Lionycteris_spurrelli	3	30	19	0.6333	TRUE	0
Lonchophylla_thomasi	27	30	30	1	TRUE	0
Lonchorhina_inusitata	3	30	28	0.9333	TRUE	0
Lophostoma_brasiliense	8	30	30	1	TRUE	0
Lophostoma_carrikeri	3	30	21	0.7	TRUE	0
Macrophyllum_macrophyllum	4	30	27	0.9	TRUE	0
Mesophylla_macconnelli	3	30	19	0.6333	TRUE	0
Micronycteris_nicefori	3	30	17	0.5667	TRUE	0
Mimon_crenulatum	4	30	26	0.8667	TRUE	0
Molossus_molossus	9	30	26	0.8667	FALSE	4
Molossus_rufus	4	30	23	0.7667	TRUE	0
Myotis_riparius	9	30	30	1	TRUE	0
Noctilio_albiventris	3	30	13	0.4333	TRUE	0
Noctilio_leporinus	4	30	20	0.6667	FALSE	3
Phyllostomus_discolor	3	30	6	0.2	TRUE	0
Phyllostomus_elongatus	3	30	19	0.6333	TRUE	0
Platyrrhinus_aurarius	14	30	26	0.8667	TRUE	0
Platyrrhinus_helleri	3	30	16	0.5333	TRUE	0
Pteronotus_personatus	3	30	19	0.6333	TRUE	0
Rhinophylla_pumilio	23	30	30	1	TRUE	0
Rhynchonycteris_naso	4	30	30	1	TRUE	0
Sturnira_lilium	4	30	21	0.7	TRUE	0
Sturnira_tildae	22	30	29	0.9667	TRUE	0
Trachops_cirrhosus	10	60	59	0.9833	TRUE	0
Uroderma_bilobatum	3	30	4	0.1333	TRUE	0
Vampyressa_bidens	3	30	15	0.5	TRUE	0
Vampyressa_brocki	4	30	19	0.6333	TRUE	0
Vampyrodes_caraccioli	3	30	20	0.6667	TRUE	0

## Sheet: birds
Group	# Real sequences (n_real)	# Synthetic sequences (n_synth)	# Synthetic in real clade (synth_in_real_clade)	In-clade rate (synth/real clade) (= in_clade_rate)	Real clade monophyly (= real_monophyly)	Non-focal real-tip count (= other_real_in_mrca)
A100	3	30	20	0.6667	FALSE	309
A106	3	30	30	1	TRUE	0
A109	10	30	30	1	TRUE	0
A11	4	30	12	0.4	TRUE	0
A113	3	30	27	0.9	TRUE	0
A116	3	30	27	0.9	TRUE	0
A124	5	30	30	1	FALSE	35
A125	3	30	23	0.7667	FALSE	4
A127	3	30	17	0.5667	TRUE	0
A129	3	30	20	0.6667	TRUE	0
A130	3	30	24	0.8	FALSE	10
A131	13	30	30	1	FALSE	4
A135	5	30	28	0.9333	TRUE	0
A136	3	30	7	0.2333	TRUE	0
A137	3	30	0	0	TRUE	0
A139	4	30	30	1	TRUE	0
A140	3	30	29	0.9667	TRUE	0
A141	3	30	21	0.7	TRUE	0
A146	4	30	30	1	FALSE	3
A147	17	30	30	1	TRUE	0
A148	3	30	30	1	FALSE	25
A149	4	30	0	0	TRUE	0
A15	8	30	26	0.8667	TRUE	0
A19	29	30	30	1	TRUE	0
A2	3	30	0	0	TRUE	0
A21	9	30	28	0.9333	TRUE	0
A24	3	30	24	0.8	TRUE	0
A25	9	30	30	1	TRUE	0
A28	4	30	7	0.2333	TRUE	0
A29	6	30	29	0.9667	TRUE	0
A30	6	30	30	1	TRUE	0
A32	11	30	30	1	TRUE	0
A37	7	30	29	0.9667	TRUE	0
A4	3	30	0	0	TRUE	0
A45	3	30	5	0.1667	TRUE	0
A5	3	30	28	0.9333	TRUE	0
A52	22	30	30	1	FALSE	13
A53	3	30	4	0.1333	TRUE	0
A54	3	30	22	0.7333	TRUE	0
A60	6	30	24	0.8	TRUE	0
A61	3	30	27	0.9	TRUE	0
A66	3	30	21	0.7	TRUE	0
A69	3	30	15	0.5	TRUE	0
A72	4	30	12	0.4	TRUE	0
A75	10	30	29	0.9667	TRUE	0
A77	5	30	30	1	TRUE	0
A78	3	30	17	0.5667	TRUE	0
A80	4	30	17	0.5667	TRUE	0
A83	4	30	27	0.9	TRUE	0
A84	4	30	30	1	FALSE	3
A86	3	30	26	0.8667	TRUE	0
A9	17	30	30	1	TRUE	0
A92	3	30	10	0.3333	TRUE	0
A97	3	30	29	0.9667	TRUE	0

## Sheet: cypraeidae
Taxon	# Real sequences (n_real)	# Synthetic sequences (n_synth)	# Synthetic in real clade (synth_in_real_clade)	In-clade rate (synth/real clade) (= in_clade_rate)	Real clade monophyly (= real_monophyly)	Non-focal real-tip count (= other_real_in_mrca)
Annepona_mariae	4	30	25	0.8333	FALSE	1239
Arestorides_argus	3	30	16	0.5333	TRUE	0
Austrocypraea_reevei	3	30	18	0.6	TRUE	0
Bistolia_hirundo	13	30	30	1	TRUE	0
Bistolida_kieneri	14	30	30	1	TRUE	0
Bistolida_stolida	14	30	24	0.8	TRUE	0
Bistolida_ursellus	3	30	21	0.7	TRUE	0
Blasicrura_interrupta	4	30	21	0.7	TRUE	0
Blasicrura_pallidula	5	30	16	0.5333	TRUE	0
Chelycypraea_testudinaria	4	30	12	0.4	TRUE	0
Contradusta_walkeri	4	30	18	0.6	TRUE	0
Cribrarula_catholicorum	3	30	15	0.5	TRUE	0
Cribrarula_cribraria	37	30	30	1	FALSE	9
Cribrarula_cumingii	15	30	25	0.8333	TRUE	0
Cribrarula_esontropia	5	30	21	0.7	FALSE	4
Cribrarula_exmouthensis	4	30	29	0.9667	TRUE	0
Cribrarula_gaskoinii	9	30	29	0.9667	TRUE	0
Cypraea_pantherina	4	30	25	0.8333	TRUE	0
Cypraea_tigris	54	30	30	1	TRUE	0
Eclogavena_quadrimaculata	7	30	30	1	TRUE	0
Erosaria_acicularis	5	30	30	1	FALSE	5
Erosaria_beckii	4	30	10	0.3333	TRUE	0
Erosaria_cernica	6	30	30	1	TRUE	0
Erosaria_englerti	6	30	19	0.6333	TRUE	0
Erosaria_erosa	13	30	22	0.7333	TRUE	0
Erosaria_helvola	73	30	28	0.9333	TRUE	0
Erosaria_labrolineata	4	30	26	0.8667	TRUE	0
Erosaria_lamarckii	10	30	27	0.9	TRUE	0
Erosaria_miliaris	3	30	20	0.6667	TRUE	0
Erosaria_nebrites	3	30	25	0.8333	TRUE	0
Erosaria_ocellata	5	30	26	0.8667	TRUE	0
Erosaria_poraria	5	30	12	0.4	TRUE	0
Erosaria_spurca	5	30	30	1	TRUE	0
Erosaria_thomasi	3	30	3	0.1	TRUE	0
Erosaria_turdus	3	30	13	0.4333	FALSE	269
Erronea_caurica	52	30	30	1	FALSE	519
Erronea_cylindrica	9	30	30	1	FALSE	12
Erronea_errones	30	30	30	1	FALSE	57
Erronea_onyx	11	30	30	1	FALSE	10
Erronea_ovum	18	30	30	1	FALSE	90
Erronea_subviridis	7	30	27	0.9	FALSE	14
Erronea_succincta	3	30	14	0.4667	TRUE	0
Erronea_vredenburgi	4	30	28	0.9333	TRUE	0
Leporicypraea_geographica	17	30	30	1	TRUE	0
Leporicypraea_mappa	25	30	30	1	FALSE	17
Luria_cinerea	6	30	30	1	TRUE	0
Luria_isabella	14	30	30	1	TRUE	0
Luria_lurida	5	30	21	0.7	TRUE	0
Luria_pulchra	3	30	29	0.9667	TRUE	0
Luria_tessellata	4	30	14	0.4667	TRUE	0
Lyncina_carneola	15	30	26	0.8667	TRUE	0
Lyncina_leviathan	4	30	11	0.3667	TRUE	0
Lyncina_lynx	5	30	23	0.7667	TRUE	0
Lyncina_schilderorum	3	30	1	0.0333	TRUE	0
Lyncina_ventriculus	5	30	19	0.6333	TRUE	0
Lyncina_vitellus	6	30	21	0.7	TRUE	0
Macrocypraea_cervinetta	5	30	29	0.9667	TRUE	0
Macrocypraea_cervus	4	30	25	0.8333	FALSE	4
Macrocypraea_zebra	7	30	30	1	FALSE	4
Mauritia_arabica	60	30	30	1	TRUE	0
Mauritia_depressa	22	30	26	0.8667	TRUE	0
Mauritia_eglantina	5	30	30	1	TRUE	0
Mauritia_grayana	12	30	28	0.9333	TRUE	0
Mauritia_histrio	6	30	30	1	TRUE	0
Mauritia_maculifera	19	30	29	0.9667	TRUE	0
Mauritia_mauritiana	6	30	17	0.5667	TRUE	0
Mauritia_scurra	9	30	30	1	TRUE	0
Melicerona_felina	6	30	22	0.7333	TRUE	0
Melicerona_listeri	9	30	30	1	FALSE	6
Monetaria_annulus	50	30	30	1	FALSE	12
Monetaria_caputdraconis	7	30	29	0.9667	TRUE	0
Monetaria_caputserpentis	21	30	30	1	TRUE	0
Monetaria_moneta	9	30	23	0.7667	TRUE	0
Monetaria_obvelata	12	30	29	0.9667	FALSE	44
Neobernaya_spadicea	5	30	28	0.9333	TRUE	0
Notadusta_punctata	31	30	30	1	TRUE	0
Notocypraea_angustata	4	30	2	0.0667	TRUE	0
Notocypraea_comptoni	12	30	29	0.9667	TRUE	0
Notocypraea_declivis	3	30	26	0.8667	TRUE	0
Notocypraea_piperita	5	30	15	0.5	TRUE	0
Nucleolaria_granulata	4	30	18	0.6	FALSE	2
Nucleolaria_nucleus	6	30	30	1	FALSE	4
Ovatipsa_chinensis	13	30	29	0.9667	TRUE	0
Ovatipsa_coloba	7	30	27	0.9	TRUE	0
Palmadusta_artuffeli	5	30	25	0.8333	TRUE	0
Palmadusta_asellus	9	30	30	1	TRUE	0
Palmadusta_clandestina	26	30	30	1	FALSE	5
Palmadusta_contaminata	5	30	24	0.8	TRUE	0
Palmadusta_humphreysii	3	30	23	0.7667	TRUE	0
Palmadusta_lentiginosa	4	30	29	0.9667	TRUE	0
Palmadusta_ziczac	3	30	28	0.9333	TRUE	0
Postularia_margarita	5	30	24	0.8	TRUE	0
Pseudozonaria_robertsi	5	30	27	0.9	TRUE	0
Purpuradusta_fimbriata	50	30	29	0.9667	TRUE	0
Purpuradusta_gracilis	14	30	30	1	TRUE	0
Purpuradusta_hammondae	5	30	26	0.8667	TRUE	0
Purpuradusta_microdon	4	30	28	0.9333	TRUE	0
Purpuradusta_minoridens	6	30	1	0.0333	TRUE	0
Purpuradusta_oryzaeformis	4	30	26	0.8667	TRUE	0
Purpuradusta_serrulifera	3	30	20	0.6667	TRUE	0
Pustularia_bistrinotata	9	30	29	0.9667	FALSE	4
Pustularia_cicercula	9	30	21	0.7	TRUE	0
Pustularia_globulus	6	30	27	0.9	TRUE	0
Pustularia_mauiensis	4	30	21	0.7	TRUE	0
Staphylaea_limacina	9	30	24	0.8	TRUE	0
Staphylaea_staphylaea	6	30	30	1	TRUE	0
Talostolida_pellucens	16	30	26	0.8667	TRUE	0
Talostolida_teres	8	30	29	0.9667	TRUE	0
Talparia_talpa	3	30	24	0.8	TRUE	0
Trona_stercoraria	3	30	14	0.4667	TRUE	0
Umbilia_capricornica	3	30	21	0.7	TRUE	0
Zoila_decipiens	5	30	30	1	FALSE	17
Zoila_friendii	10	30	28	0.9333	FALSE	7
Zoila_jeaniana	7	30	30	1	FALSE	10
Zoila_ketyana	8	30	26	0.8667	FALSE	1
Zoila_marginata	8	30	30	1	FALSE	8
Zoila_rosselli	8	30	29	0.9667	TRUE	0
Zoila_venusta	4	30	28	0.9333	TRUE	0
Zonaria_zonaria	4	30	13	0.4333	TRUE	0

## Sheet: drosophila
Taxon	# Real sequences (n_real)	# Synthetic sequences (n_synth)	# Synthetic in real clade (synth_in_real_clade)	In-clade rate (synth/real clade) (= in_clade_rate)	Real clade monophyly (= real_monophyly)	Non-focal real-tip count (= other_real_in_mrca)
Drosophila_angor	9	30	30	1	FALSE	412
Drosophila_arizonae	17	30	26	0.8667	FALSE	47
Drosophila_barutani	6	30	23	0.7667	TRUE	0
Drosophila_falleni	14	30	29	0.9667	TRUE	0
Drosophila_innubila	4	30	27	0.9	TRUE	0
Drosophila_melanogaster	5	30	18	0.6	TRUE	0
Drosophila_mettleri	24	30	29	0.9667	TRUE	0
Drosophila_mojavensis	47	30	30	1	TRUE	0
Drosophila_montana	42	30	30	1	TRUE	0
Drosophila_navojoa	4	30	25	0.8333	TRUE	0
Drosophila_nigrospiracula	10	30	27	0.9	TRUE	0
Drosophila_pachea	79	30	29	0.9667	TRUE	0
Drosophila_recens	36	30	30	1	FALSE	1
Drosophila_simulans	6	30	30	1	TRUE	0
Drosophila_subquinaria	108	30	30	1	FALSE	36
Drosophila_virilis	10	30	28	0.9333	TRUE	0
